# Supplementary material for: Iron stored in ferritin is chemically reduced in the presence of aggregating Aβ(1-42)
Source: PubMed Central journal article supplement (PMC7316746; doi:10.1038/s41598-020-67117-z), 2020-06-25
Supplement: 41598_2020_67117_MOESM1_ESM.pdf [file 41598_2020_67117_MOESM1_ESM.pdf]

1 **Supplementary Information: Iron stored in ferritin is chemically reduced in the**  
2 **presence of aggregating A $\beta$ (1-42)**

3 James Everett<sup>1,2\*</sup>, Jake Brooks<sup>2</sup>, Frederik Lermyte<sup>2,3</sup>, Peter B. O'Connor<sup>3</sup>, Peter J.  
4 Sadler<sup>3</sup>, Jon Dobson<sup>4,5</sup>, Joanna F. Collingwood<sup>2,5</sup> and Neil D. Telling<sup>1</sup>

5 *<sup>1</sup>School of Pharmacy and Bioengineering, Keele University, Stoke-on-Trent,*  
6 *Staffordshire, ST4 7QB, United Kingdom*

7 *<sup>2</sup>School of Engineering, University of Warwick, Coventry, CV4 7AL, United Kingdom*

8 *<sup>3</sup>Department of Chemistry, University of Warwick, Coventry, CV4 7AL, United*  
9 *Kingdom*

10 *<sup>4</sup>J. Crayton Pruitt Family Department of Biomedical Engineering & Department of*  
11 *Materials Science and Engineering, University of Florida, Gainesville, Florida 32611,*  
12 *United States*

13 *<sup>5</sup>Department of Materials Science and Engineering, University of Florida, Gainesville,*  
14 *Florida 32611, United States*

15 \*Corresponding author: [j.everett@keele.ac.uk](mailto:j.everett@keele.ac.uk)

- 1 **Table S1.** A $\beta$ (1-42) batches and X-ray spectromicroscopy beamlines used to
- 2 generate the data shown in Figures 1 – 6 and S1-S5.

| <b><u>A<math>\beta</math>(1-42) Batch</u></b> | <b><u>Investigation</u></b>                                       | <b><u>Figure(s)</u></b> |
|-----------------------------------------------|-------------------------------------------------------------------|-------------------------|
| 1                                             | Time dependent visual observation of A $\beta$ (1-42) aggregation | 1                       |
| 2                                             | TEM                                                               | 2, S1                   |
| 3                                             | STXM: PoILux beamline                                             | 3                       |
| 4                                             | STXM: PoILux beamline/TEM                                         | 4, 5, S2 (Panel 1),S4   |
| 5                                             | STXM: I08 beamline                                                | 6, S2 (Panel 2), S5     |

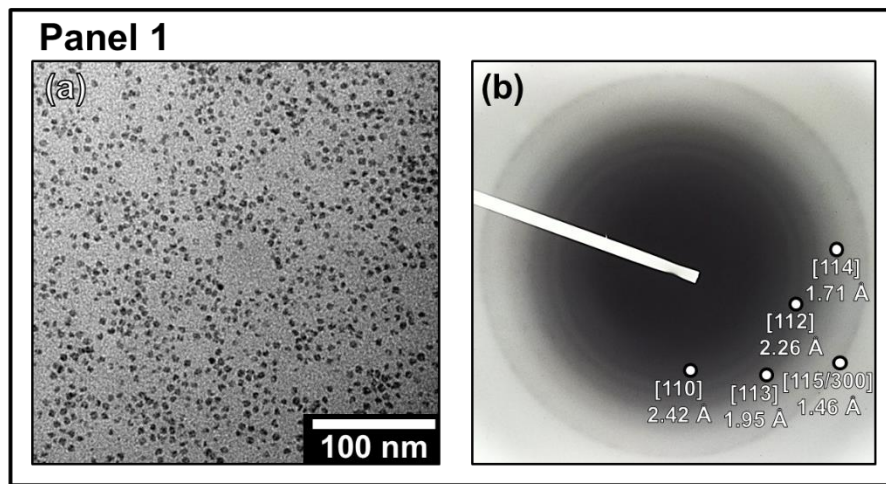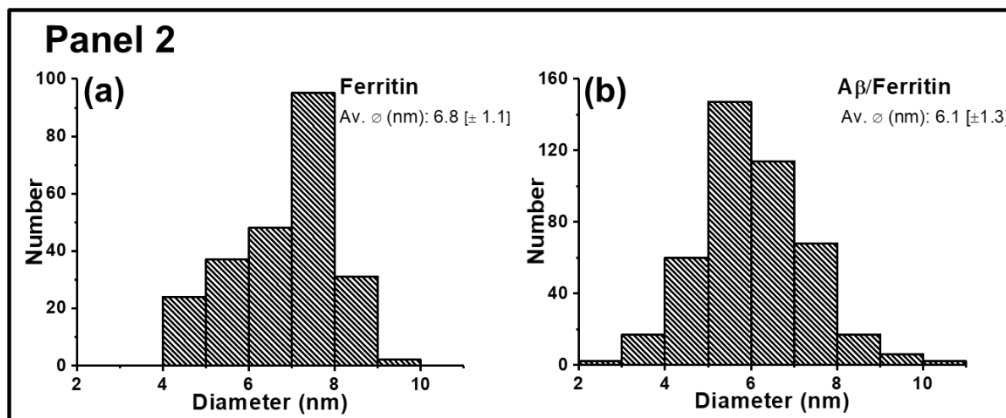

1 **Figure S1.** Characterisation of ferritin particles. **Panel 1 – (a)** TEM images and **(b)**  
 2 electron diffraction patterns from an unstained uniform ferritin sample. Electron  
 3 diffraction provided ringed pattern and  $d$ -spacing values consistent with 6-line  
 4 ferrihydrite as shown in Table S2. **Panel 2 -** Size distribution of electron dense  
 5 particulates recorded in TEM images shown in Panel 1 and Figure 2. Average  
 6 diameter size was **(a)** 6.8 nm [±1.1] for Ferritin only (n = 237) and **(b)** 6.1 nm [±1.3]  
 7 for A $\beta$ /Ferritin (n = 434) sample material.

- 1 **Table S2.** Ferritin *d*-spacing values. *d*-spacing values obtained from the ringed
- 2 patterns shown in Figure S1 compared to a ferrihydrite standard (Drits *et al.* <sup>1</sup>).

| <b><i>d</i>-spacing (nm) {relative intensity}</b> |                               |
|---------------------------------------------------|-------------------------------|
| <b>Ferritin<br/>(standard error)</b>              | <b>Ferrihydrite<br/>(hkl)</b> |
| 0.242 (±0.005){100}                               | 0.25 (110){100}               |
| 0.226 (±0.008){100}                               | 0.224 (112){80}               |
| 0.195 (±0.08){30}                                 | 0.197 (113){35}               |
| 0.171 (±0.07){30}                                 | 0.172 (114){30}               |
| -                                                 | 0.151 (115){50}               |
| 0.146 (±0.05){70}                                 | 0.147 (300){70}               |

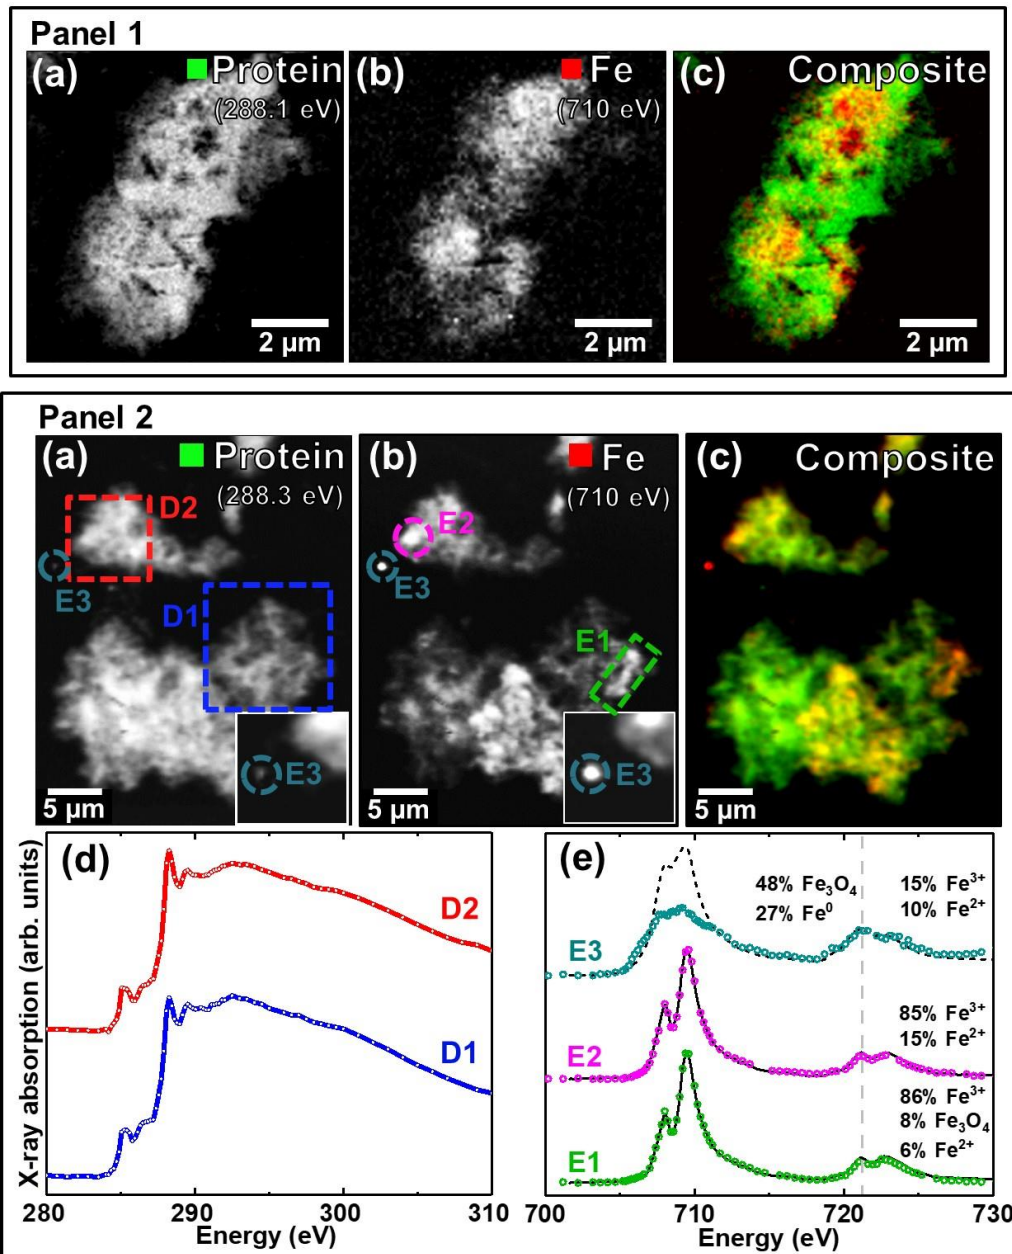

1 **Figure S2.** STXM examination of additional A $\beta$ /ferritin aggregates. **Panel 1** - STXM  
 2 speciation dependent maps from an A $\beta$ /ferritin aggregate formed following 0.5 hours  
 3 of co-incubation. **(a)** Carbon  $K$ -edge protein map. **(b)** Iron  $L$ -edge map. **(c)**  
 4 Composite image displaying protein (green) and iron (red) content of the aggregate.  
 5 **Panel 2** - STXM speciation dependent contrast maps, carbon  $K$ -edge X-ray  
 6 absorption spectra and iron  $L_{2,3}$ -edge x-ray absorption spectra from A $\beta$ /ferritin  
 7 aggregates formed following 240 hours of co-incubation. **(a)** Carbon  $K$ -edge protein  
 8 map. **(b)** Iron  $L$ -edge map. **(c)** Composite image displaying protein (green) and iron  
 9 (red) content of the aggregate. **(d)** Carbon  $K$ -edge X-ray absorption spectra from the  
 10 areas identified in the protein map (a). **(e)** Iron  $L_{2,3}$  X-ray absorption spectra from the

1 areas highlighted in the iron map (b). Examination of iron associated with fibrillar  
2 carbon morphology in this aggregate provided iron  $L_{2,3}$ -edge X-ray absorption  
3 spectra characteristic of a ferric material. Conversely iron  $L_{2,3}$ -edge examination of a  
4 dense iron deposit (ca. 500 nm diameter) associated with carbon, located  
5 approximately 1  $\mu\text{m}$  away from the main aggregate body (highlighted as area E3 in  
6 Fig. S2, Panel 2b), provided an X-ray absorption spectrum consistent with a  
7 chemically reduced iron phase. Despite clear saturation effects at the  $L_3$  edge,  
8 manifesting in the apparent enhancement of the  $L_2$  to  $L_3$  peak ratio, this iron was  
9 determined to be chemically-reduced due to the enhanced  $\text{Fe}^{2+}$  features and  
10 diminished  $\text{Fe}^{3+}$  features recorded at the low-intensity iron  $L_2$ -absorption edge where  
11 saturation effects do not contribute to the X-ray spectrum. Fitting of this spectrum  
12 over the  **$L_2$ -edge only**, indicated this area to be comprised of primarily magnetite  
13 and  $\text{Fe}^0$  with minor contributions from both  $\text{Fe}^{3+}$  and  $\text{Fe}^{2+}$  cations. This dense  
14 particulate iron deposit was similar in morphology and size to that shown in Fig. 5,  
15 which was also found to be in a chemically reduced state (Fig. 5f). Best fit curves  
16 were created by superposition of suitably scaled iron reference X-ray absorption  
17 spectra as described in Everett *et al.* 2018 <sup>2</sup>. Of the 10 A $\beta$ /ferritin aggregates  
18 examined over the entire iron  $L_{2,3}$ -edge using STXM, 5 were found to contain  
19 chemically-reduced iron (50%). Within this population, 1-2 reduced iron particulates  
20 were identified per aggregate.

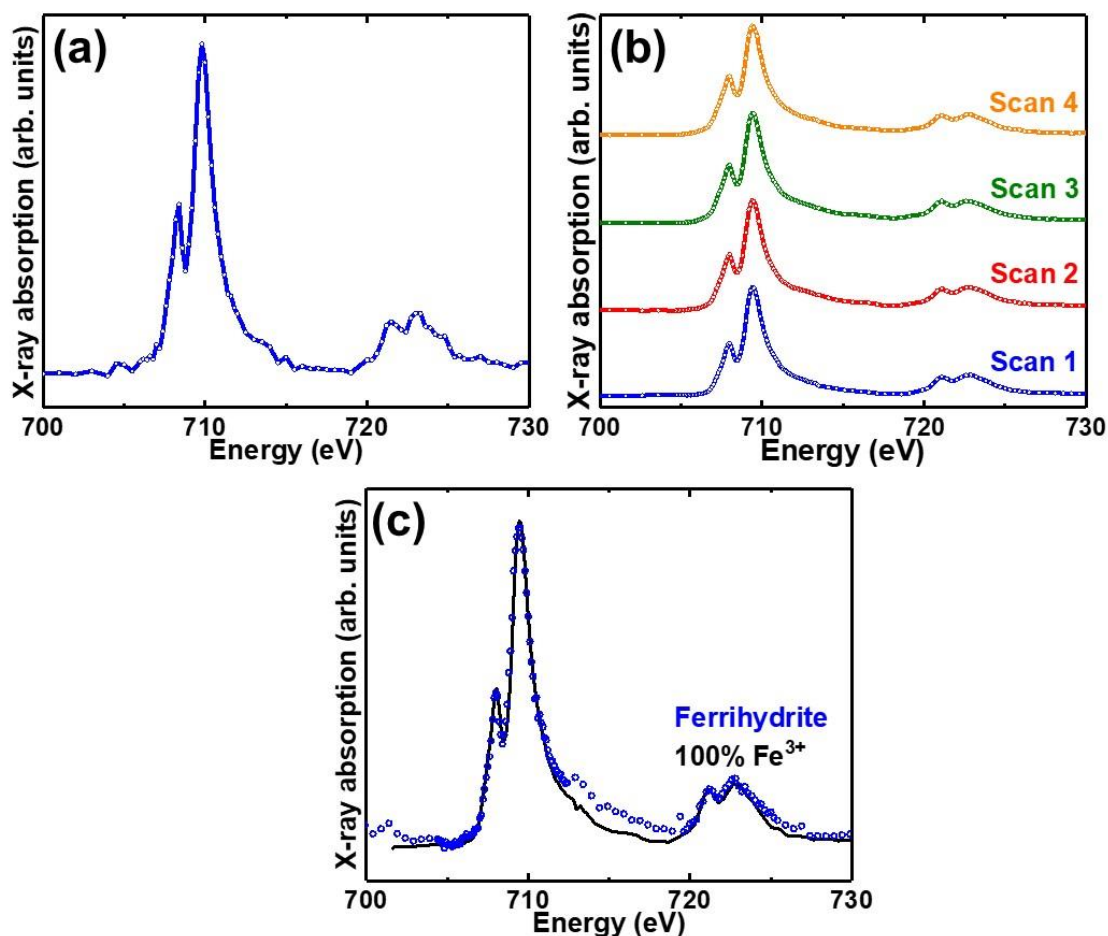

1 **Figure S3.** Ferritin and ferrihydrite x-ray absorption spectra. **(a)** Iron  $L_{2,3}$ -edge  
 2 absorption spectrum from ferritin acquired at Diamond Light Source beamline I08.  
 3 This spectrum is characteristic of a pure ferric ( $\text{Fe}^{3+}$ ) phase. **(b)** Iron  $L_{2,3}$ -edge  
 4 absorption spectra from ferritin collected over four successive scans performed at  
 5 Diamond Light Source beamline I10. Sample preparation and examination for (b)  
 6 followed the methodology described in Everett *et al.* 2014<sup>3,4</sup>. **(c)** Ferrihydrite iron  
 7  $L_{2,3}$ -edge absorption spectrum (blue) collected at Diamond Light Source beamline  
 8 I08. Ferrihydrite was incubated in KH buffer for 240 hours at 37 °C. The best fit curve  
 9 for this spectrum (black line) was consistent with a pure ferric material, indicating no  
 10 chemical reduction of ferrihydrite occurred during incubation in the buffer medium.  
 11 Best fit curves were created by superposition of suitably scaled iron reference X-ray  
 12 absorption spectra as described in Everett *et al.* 2018<sup>2</sup>.

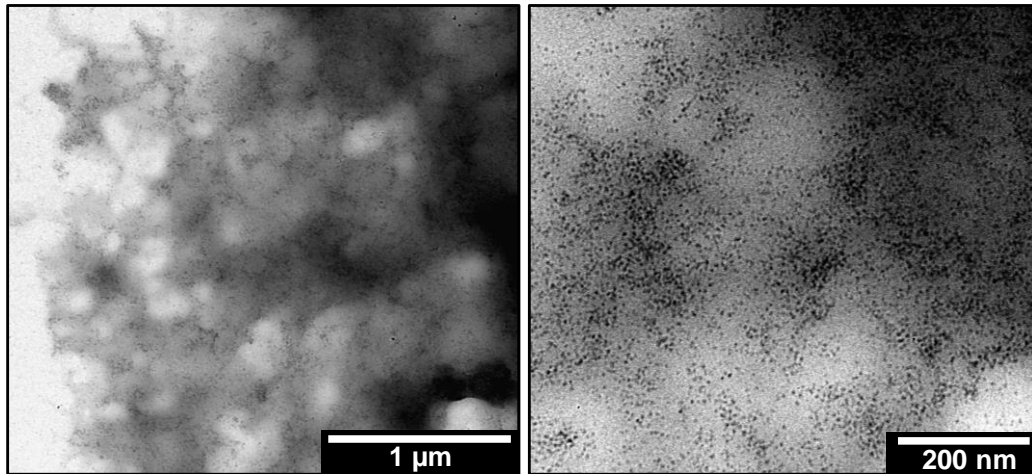

1 **Figure S4.** TEM images of an additional A $\beta$ /ferritin aggregate. TEM images of an  
 2 A $\beta$ /ferritin aggregate found in close proximity to the aggregate structure shown in  
 3 Fig. 5 of the main text. The aggregate is poorly fibrillar in structure containing a large  
 4 number of electron dense ferritin particles.

**A $\beta$  and Ferritin (*in vitro*)**

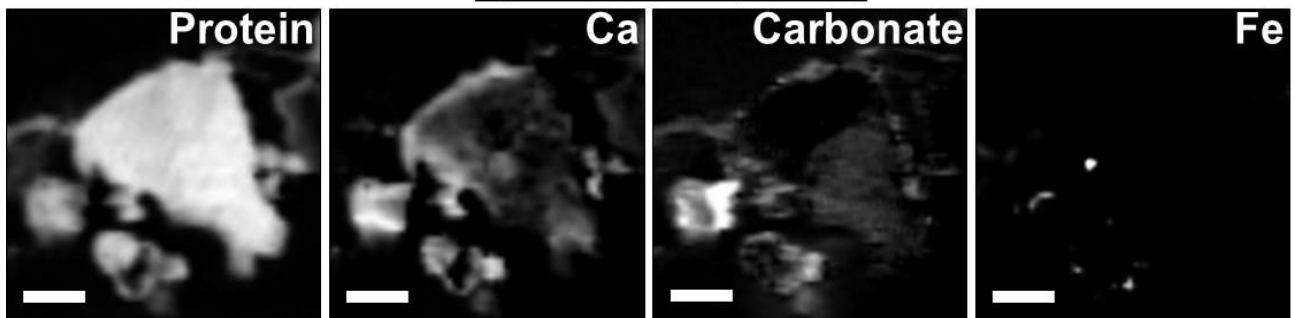

**AD amyloid plaque cores (*ex vivo*)**

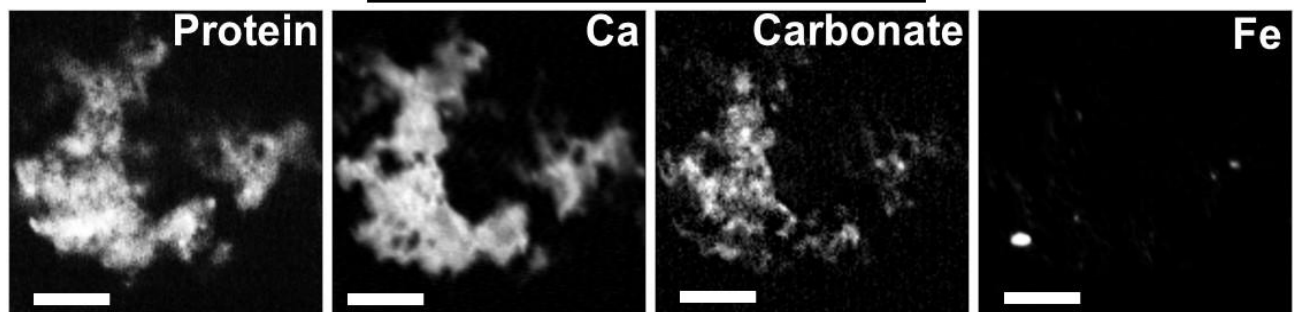

5 **Figure S5.** Carbon *K*-edge protein and carbonate maps, calcium *L*-edge maps and  
 6 Iron *L*<sub>3</sub>-edge maps comparing the A $\beta$ /ferritin aggregate from Figure 6 in the main text  
 7 (top row), and a human amyloid plaque core from on AD subject (bottom row; from  
 8 Everett *et al.* 2018 <sup>2</sup>). Scale bars = 2  $\mu$ m.



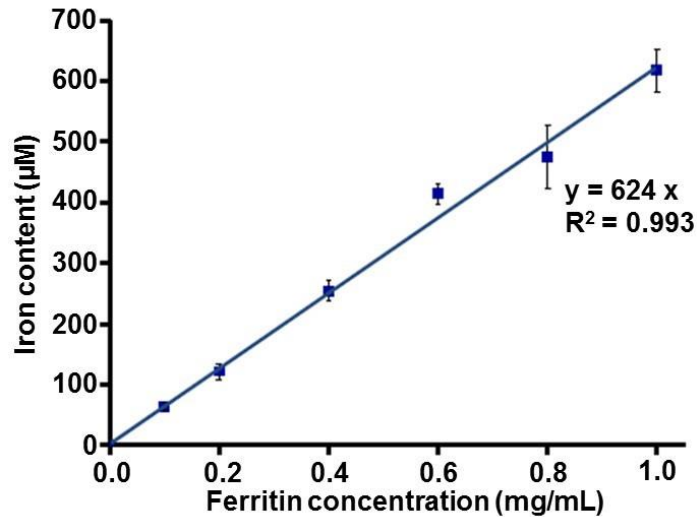

1 **Figure S6.** Spectrophotometric determination of ferritin iron content.

2 Spectrophotometric determination of the iron content of ferritin was achieved through  
 3 a Ferrozine iron quantification assay. Ferrozine selectively binds to  $\text{Fe}^{2+}$  ions creating  
 4 a stable magenta coloured solution upon binding, which absorbs light at a  
 5 wavelength of 562 nm. Ferritin stock (125 mg/mL) was diluted in  $\text{dH}_2\text{O}$  to achieve  
 6 ferritin concentrations varying between 0.1-1.0 mg/mL. These colloidal ferritin  
 7 dispersions were acid digested in 2M  $\text{HNO}_3$  at 60°C overnight, before being  
 8 chemically-reduced in 3.3 M hydroxylamine hydrochloride for 3 h at room  
 9 temperature. 100  $\mu\text{L}$  aliquots of digested/reduced samples were added to 700  $\mu\text{L}$  of  
 10 2 mM Ferrozine, and absorbance read at 562 nm using a BioTek plate reader. Iron  
 11 concentration as a function of ferritin concentration using this approach was  
 12 determined as 624  $\mu\text{M}$  (0.035 mg/mL) iron per 1 mg/mL (2.2  $\mu\text{M}$ ) of ferritin, equating  
 13 to ca. 300 iron atoms per ferritin unit. This sub-maximal loading of iron within horse  
 14 spleen ferritin is consistent with previous literature <sup>5</sup>.

15 **Incubation of ferritin in KH buffer does not result in ferritin iron leaching**

16 To assess the effect of ferritin incubation in KH buffer on the leaching of iron from the  
 17 ferritin cage, “free” iron concentration as a percentage of total iron content was  
 18 determined for ferritin suspensions incubated in KH buffer over a 240 hour period.

1 Briefly, ferritin stock suspensions (from horse spleen, Type I; 125 mg/mL; 1% saline  
2 solution; Sigma Aldrich) were diluted dropwise into a 36 mM nitrilotriacetic acid  
3 (NTA) solution (pH 7.4), to achieve a final ferritin concentration corresponding to 18  
4 mM iron content (i.e. 2:1 NTA to iron ratio). This step was performed to complex any  
5 free iron not bound within the ferritin proteins.

6 NTA-ferritin suspensions were then diluted in KH buffer (pH 7.4) to the working  
7 concentrations described in the main text, and incubated at 37 °C. Samples were  
8 taken 0, 48, 144 and 240 hours after the addition of the NTA-ferritin suspension to  
9 the KH buffer.

10 An additional ferritin control sample was prepared by diluting the NTA-ferritin  
11 suspensions in dH<sub>2</sub>O, as to provide a free iron concentration arising from the starting  
12 ferritin suspension.

13 To assess the level of free iron in the NTA-ferritin suspensions, as a percentage of  
14 total iron content, NTA-ferritin suspensions were added to a centrifugal concentrator  
15 (Vivaspin 500; 5K MWCO) and spun at 14500 rpm for 40 minutes. The iron  
16 concentration of resulting filtrate (containing free iron complexed to NTA, but devoid  
17 of intact ferritin), and the starting (unfiltered) NTA-ferritin suspensions were then  
18 determined using the Ferrozine iron quantification assay described above.

19 Free iron concentrations as a percentage of total iron for the NTA-ferritin  
20 suspensions are shown in Table S3 and Figure S7. For the NTA-ferritin control  
21 suspensions in dH<sub>2</sub>O, free iron was shown to account for *ca.* 1.4% of the total iron  
22 concentration ( $\pm 1.5$ ; n=6), demonstrating a low level of free iron and/or disrupted  
23 ferritin proteins (thereby allowing NTA to complex with iron) to be present in the  
24 starting ferritin suspension. The free iron concentration for NTA-ferritin suspensions

- 1 incubated in KH buffer fell within the control sample range for all time points  
 2 examined (Table S3 and Figure S7; sample size n=3). These results demonstrate  
 3 that incubation of ferritin in the KH buffer does not result in the leaching of ferritin  
 4 iron.
- 5 **Table S3.** Free iron concentration as a percentage of total iron for NTA-ferritin  
 6 suspensions in dH<sub>2</sub>O (n=6), and KH buffer (n=3).

| <b><u>Sample</u></b>                           | <b><u>Free iron<br/>(% total iron)</u></b> | <b><u>Standard<br/>deviation</u></b> |
|------------------------------------------------|--------------------------------------------|--------------------------------------|
| Ferritin in dH <sub>2</sub> O                  | 1.37                                       | 1.46                                 |
| <b>Ferritin in KH buffer incubation series</b> |                                            |                                      |
| <b><u>Incubation<br/>time (hrs)</u></b>        | <b><u>Free iron<br/>(% total iron)</u></b> | <b><u>Standard<br/>deviation</u></b> |
| 0                                              | 0.22                                       | 0.38                                 |
| 48                                             | 0.57                                       | 0.57                                 |
| 144                                            | 1.65                                       | 1.15                                 |
| 240                                            | 0.92                                       | 0.28                                 |

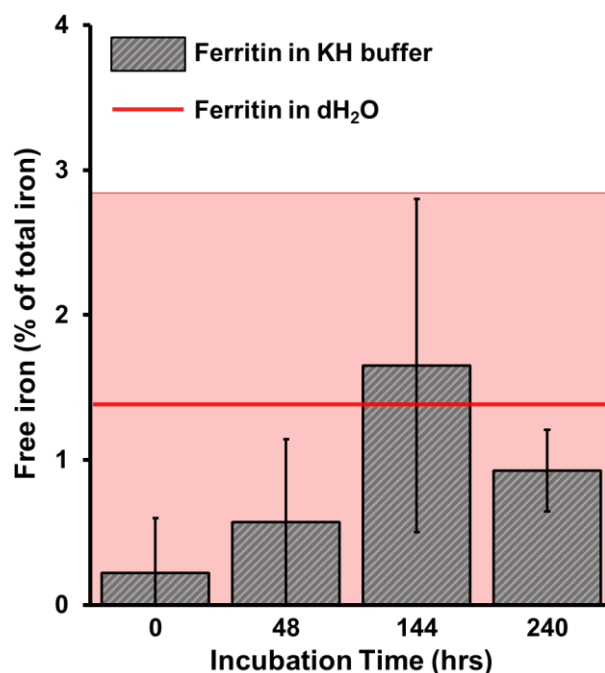

1 **Figure S7.** Free iron concentration as a percentage of total iron for NTA-ferritin  
 2 suspensions, following incubation in KH buffer over a 240 hour time series. Error  
 3 bars show standard deviation (n=3). The red line shows the free iron concentration  
 4 recorded in the control NTA-ferritin suspensions in dH<sub>2</sub>O (not measured as a  
 5 function of time). This value corresponds to the free iron present in the starting  
 6 ferritin solution. The shaded red area shows the standard deviation of these control  
 7 suspension measurements (n=6).

## 8 **Supplementary Information References**

- 9 1. Drits, V. A., Sakharov, B. A., Salyn, A. L. & Manceau, A. Structural model for  
 10 ferrihydrite. *Clay Minerals*. **28**, 185-207 (1993).
- 11 2. Everett, J. *et al.* Nanoscale synchrotron X-ray speciation of iron and calcium  
 12 compounds in amyloid plaque cores from Alzheimer's disease subjects.  
 13 *Nanoscale*. **10**, 11782-11796 (2018).
- 14 3. Everett, J. *et al.* Ferrous iron formation following the co-aggregation of ferric  
 15 iron and the Alzheimer's disease peptide beta-amyloid (1-42). *Journal of the*  
 16 *Royal Society Interface*. **11**, 20140165 (2014).
- 17 4. Everett, J. *et al.* Evidence of Redox-Active Iron Formation Following  
 18 Aggregation of Ferrihydrite and the Alzheimer's Disease Peptide beta-  
 19 Amyloid. *Inorganic Chemistry*. **53**, 2803-2809 (2014).
- 20 5. Skinner, O. S. *et al.* Native Electron Capture Dissociation Maps to Iron-  
 21 Binding Channels in Horse Spleen Ferritin. *Analytical Chemistry*. **89**, 10711-  
 22 10716 (2017).
